# Supplementary material for: Docosahexaenoic Acid as the Bidirectional Biomarker of Dietary and Metabolic Risk Patterns in Chinese Children: A Comparison with Plasma and Erythrocyte
Source: MDPI journal article supplement (doi:10.3390/nu14153095), 2022-07-28
Supplement: s1 [file s1]

**Table S1.** Factor loadings for dietary patterns of children

| <b>Food items</b>          | <b>Balance pattern</b> | <b>Plant pattern</b> | <b>Beverage &amp; snacks pattern</b> |
|----------------------------|------------------------|----------------------|--------------------------------------|
| Rice                       | 0.322                  | 0.189                | -0.005                               |
| Coarse cereals             | 0.198                  | 0.483                | 0.195                                |
| Wheat floor                | 0.218                  | 0.333                | 0.106                                |
| Tubers                     | 0.433                  | 0.340                | -0.260                               |
| Soybean and its products   | 0.383                  | 0.433                | 0.261                                |
| Fresh beans                | 0.453                  | 0.232                | 0.099                                |
| Leaf-off vegetable         | 0.544                  | 0.388                | -0.214                               |
| Leafy vegetable            | 0.176                  | -0.203               | 0.021                                |
| Fruits                     | 0.591                  | -0.005               | 0.009                                |
| Meat                       | 0.397                  | -0.460               | -0.006                               |
| Poultry                    | 0.510                  | -0.327               | 0.106                                |
| Fish                       | 0.411                  | -0.240               | -0.332                               |
| Shrimp, crab and shellfish | 0.315                  | -0.123               | -0.332                               |
| Egg                        | 0.224                  | -0.273               | -0.174                               |
| Milk and its products      | 0.207                  | -0.174               | 0.384                                |
| Nuts                       | 0.553                  | -0.173               | -0.041                               |
| Fungi and algae            | 0.490                  | -0.067               | -0.293                               |
| Snacks                     | 0.343                  | -0.205               | 0.535                                |
| Beverage                   | 0.268                  | -0.138               | 0.548                                |
